# Supplementary material for: Native Microbes Amplify Native Seedling Establishment and Diversity While Inhibiting a Non-Native Grass
Source: MDPI journal article supplement (doi:10.3390/plants12051184), 2023-03-06

## Supplement S1. Koziol et. al.

Supplemental results on weed recruitment.

Table S1. Seed list

Table S2. Full intrinsic species list.

Table S3. First Harvest Results

Table S4. Second Harvest Results

Figure S1. Photograph of the pots prior to harvest.

Figure S2. The effect of inoculation across first and second harvests where the main effect of inocula was consistent between harvests.

Figure S3. The effect of inoculation across first and second harvests where the main effect of inocula increased or decreased between harvests.

### *Non-seeded plant recruitment*

Several species were observed that were not seeded into the experiment. Our best guess is that these species were recruited in the ex-arable soil inocula or as weeds in the native seed mixture. *Amaranthus sp.*, *Daucus carota*, *Bromus tectorum*, *Melilotus officinalis*, *Panicum oligosanthos*, *Polygonum sp.*, *Primula vulgaris*, *Euphorbia sp.*, *Viola sororia*, *Panicum capillare*, *Andropogon virginicus*, *Trifolium pratense* and *Medicago lupulina*. These species were included with the seeded non-native when comparing native vs non-native abundances. On average, the combined total biomass of these non-seeded weed species was 3% of entire pot biomass.

Table S1. Seed list with each plant's common and scientific name, functional group, coefficient of conservation (CC) score<sup>1</sup>, seed source location, and whether it was observed in the study.

| Common Name                 | Scientific Name                  | Functional Group | CC score | Seed Source     | Observed in Study |
|-----------------------------|----------------------------------|------------------|----------|-----------------|-------------------|
| Leadplant                   | <i>Amorpha canescens</i>         | Legume           | 7        | Hamilton        | Yes               |
| Milkweed, Swamp             | <i>Asclepias incarnata</i>       | Forb             | 4        | Hamilton        | Yes               |
| Milkweed, Common            | <i>Asclepias syriaca</i>         | Forb             | 1        | Hamilton        | Yes               |
| Milkweed, Butterfly         | <i>Asclepias tuberosa</i>        | Forb             | 6        | Hamilton        | Yes               |
| Indigo, Blue                | <i>Baptisia australis</i>        | Legume           | 6        | Hamilton        | Yes               |
| Sunflower, Tickseed         | <i>Bidens aristosa</i>           | Forb             | 3        | Hamilton        | Yes               |
| Indian Paintbrush           | <i>Castilleja coccinea</i>       | Forb             | 4        | Hamilton        | No                |
| Partridge Pea               | <i>Chamaecrista fasciculata</i>  | Legume           | 2        | Hamilton        | Yes               |
| Coreopsis, Grand            | <i>Coreopsis grandiflora</i>     | Forb             | 8        | Hamilton        | No                |
| Coreopsis, Tickseed         | <i>Coreopsis lanceolata</i>      | Forb             | 7        | Hamilton        | Yes               |
| Coreopsis, Plains           | <i>Coreopsis tinctoria</i>       | Forb             | 1        | Hamilton        | Yes               |
| White Prairie Clover        | <i>Dalea candidum</i>            | Legume           | 7        | Prairie Moon    | Yes               |
| Purple Prairie Clover       | <i>Dalea purpurea</i>            | Legume           | 7        | Prairie Moon    | Yes               |
| Illinois Bundleflower       | <i>Desmanthus illinoensis</i>    | Legume           | 2        | Hamilton        | Yes               |
| Coneflower, Pale Purple     | <i>Echinacea pallida</i>         | Forb             | 7        | Hamilton        | Yes               |
| Coneflower, Purple          | <i>Echinacea purpurea</i>        | Forb             | 3        | Hamilton        | Yes               |
| Rattlesnake master          | <i>Eryngium yuccifolium</i>      | Forb             | 7        | Hamilton        | Yes               |
| Foxtail                     | <i>Setaria faberi</i>            | Grass            | 0        | Field Collected | Yes               |
| White Prairie Gentian       | <i>Gentiana flavida</i>          | Forb             | 8        | Prairie Moon    | No                |
| Sunflower, Sawtooth         | <i>Helianthus grosseserratus</i> | Forb             | 4        | Hamilton        | Yes               |
| Sunflower, Ox-eye           | <i>Heliopsis helianthoides</i>   | Forb             | 5        | Hamilton        | Yes               |
| Lespedeza, Slender          | <i>Lespedeza virginica</i>       | Legume           | 5        | Hamilton        | Yes               |
| Little Bluestem Grass       | <i>Schizachyrium scoparium</i>   | Grass            | 5        | Hamilton        | Yes               |
| Seed Box                    | <i>Ludwigia alternifolia</i>     | Forb             | 5        | Hamilton        | Yes               |
| Sensitive Brier             | <i>Mimosa quadrivalvis</i>       | Forb             | 6        | Hamilton        | Yes               |
| Bergamot, Wild              | <i>Monarda fistulosa</i>         | Forb             | 3        | Hamilton        | Yes               |
| Sampson's Snakeroot         | <i>Orbexilum pedunculatum</i>    | Forb             | 9        | Hamilton        | Yes               |
| Beardtongue, White          | <i>Penstemon digitalis</i>       | Forb             | 4        | Hamilton        | Yes               |
| Downy flox                  | <i>Phlox pilosa</i>              | Forb             | 7        | Prairie Moon    | No                |
| Virginia Lions Heart        | <i>Physostegia virginiana</i>    | Legume           | 7        | Prairie Moon    | No                |
| Slender Mtn Mint            | <i>Pycnanthemum tenuifolium</i>  | Forb             | 4        | Hamilton        | No                |
| Coneflower, Upright Prairie | <i>Ratibida columnifera</i>      | Forb             | 4        | Hamilton        | Yes               |
| Rose, Prairie               | <i>Rosa carolina</i>             | Forb             | 5        | Hamilton        | No                |
| Black-eyed Susan, Common    | <i>Rudbeckia hirta</i>           | Forb             | 2        | Hamilton        | Yes               |
| Early Figwort               | <i>Scrophularia lanceolata</i>   | Forb             | 5        | Prairie Moon    | Yes               |
| Senna                       | <i>Senna marlandica</i>          | Legume           | 3        | Hamilton        | Yes               |
| Goldenrod, Gray             | <i>Solidago nemoralis</i>        | Forb             | 2        | Hamilton        | No                |
| Goldenrod, Rigid            | <i>Solidago rigida</i>           | Forb             | 3        | Hamilton        | Yes               |
| Prairie Dropseed            | <i>Sporobolus heterolepis</i>    | Grass            | 8        | Hamilton        | Yes               |
| Ohio Spiderwort             | <i>Tradescantia ohiensis</i>     | Forb             | 2        | Prairie Moon    | Yes               |
| Culver's root               | <i>Veronicastrum virginicum</i>  | Forb             | 8        | Hamilton        | Yes               |
| Golden Alexanders           | <i>Zizia aurea</i>               | Forb             | 5        | Hamilton        | Yes               |

Table S2. Full intrinsic species output.

| Species                  | NMDS1     | NMDS2     | p-value |
|--------------------------|-----------|-----------|---------|
| <i>B. aristosa</i>       | 0.4978811 | -0.741185 | 0.001   |
| <i>E. pallida</i>        | 0.3758625 | -0.475515 | 0.001   |
| <i>C. fasciculata</i>    | 0.4120677 | 0.7460587 | 0.001   |
| <i>S. faberi</i>         | -0.77588  | -0.083553 | 0.001   |
| <i>E. yuccifolium</i>    | 0.430899  | -0.373672 | 0.002   |
| <i>H. helianthoides</i>  | 0.3823069 | -0.329738 | 0.003   |
| <i>R. columnifera</i>    | 0.2631774 | -0.388539 | 0.004   |
| <i>M. lupulina</i>       | 0.2941195 | -0.378259 | 0.004   |
| <i>A. artemisiifolia</i> | 0.2044813 | 0.4260718 | 0.005   |
| <i>S. scoparium</i>      | 0.4244076 | 0.2123334 | 0.009   |
| <i>P. aviculare</i>      | 0.0028758 | 0.4169241 | 0.016   |
| <i>V. sororia</i>        | 0.2141607 | -0.380134 | 0.018   |
| <i>R. hirta</i>          | 0.4068963 | 0.0594642 | 0.024   |
| UF (Unknown Forb)        | 0.1385269 | -0.362878 | 0.03    |
| <i>B. alba</i>           | 0.323966  | 0.1972003 | 0.035   |
| <i>S. lanceolata</i>     | 0.0683162 | 0.3843318 | 0.036   |
| <i>A. tuberosa</i>       | 0.2083887 | -0.310465 | 0.045   |
| <i>P. cuspidatum</i>     | -0.042617 | 0.3576915 | 0.048   |
| <i>A. gerardii</i>       | 0.1858767 | 0.4012776 | 0.049   |
| <i>C. lanceolata</i>     | 0.3055674 | 0.1741912 | 0.071   |
| <i>A. retroflexus</i>    | 0.0682149 | 0.3365135 | 0.076   |
| <i>C. hirsuta</i>        | 0.2094112 | -0.284899 | 0.08    |
| <i>C. tinctoria</i>      | 0.1679516 | -0.278248 | 0.09    |
| <i>M. officinalis</i>    | 0.1491952 | -0.308403 | 0.097   |
| <i>E. purpurea</i>       | 0.2626425 | -0.170812 | 0.11    |
| <i>P. albidus</i>        | 0.2947405 | -0.139059 | 0.113   |
| <i>Z. azurea</i>         | 0.2487457 | -0.175102 | 0.126   |
| <i>L. virginica</i>      | 0.2586647 | -0.141857 | 0.153   |
| <i>T. ohiensis</i>       | -0.158657 | -0.245985 | 0.158   |
| <i>D. illinoensis</i>    | 0.133213  | -0.261549 | 0.161   |
| <i>E. serpens</i>        | 0.2763653 | -0.153518 | 0.165   |
| <i>D. candidum</i>       | 0.277384  | -0.0743   | 0.179   |
| <i>V. virginicum</i>     | -0.244972 | 0.0091704 | 0.284   |
| <i>L. alternifolia</i>   | -0.001821 | 0.2364501 | 0.298   |
| <i>D. carota</i>         | 0.0827233 | -0.196776 | 0.375   |
| <i>S. heterolepis</i>    | 0.1942285 | 0.0133795 | 0.451   |
| <i>D. tectorum</i>       | 0.0236724 | -0.179563 | 0.481   |
| <i>H. grosseserratus</i> | 0.1682253 | -0.055843 | 0.542   |

|                 |           |           |       |
|-----------------|-----------|-----------|-------|
| G. squarrosa    | 0.0441921 | -0.142147 | 0.594 |
| D. oligosanthos | 0.0065178 | -0.150447 | 0.623 |
| P. virgatum     | -0.103626 | -0.09859  | 0.648 |
| P. capillare    | -0.093565 | 0.1031263 | 0.661 |
| O. biennis      | 0.0442894 | -0.105957 | 0.703 |
| A. canescens    | 0.0986364 | -0.068576 | 0.748 |
| A. syriaca      | -0.104058 | 0.0481726 | 0.751 |
| M. microphylla  | -0.039983 | 0.1075092 | 0.759 |
| S. marilandrica | 0.0132233 | 0.1143179 | 0.768 |
| S. rigida       | 0.0048935 | -0.114755 | 0.774 |
| M. fistulosa    | 0.0958099 | 0.0190283 | 0.827 |
| D. purpureum    | -0.049126 | 0.0461818 | 0.904 |
| O. pedunculatum | 0.0026497 | 0.0076343 | 0.998 |

| Species           | NMDS1     | NMDS2     | p-value | Species           | NMDS1        | NMDS2        | p-value |
|-------------------|-----------|-----------|---------|-------------------|--------------|--------------|---------|
| B. aristosa       | 0.4978811 | -0.741185 | 0.001   | Z. azurea         | 0.248745682  | -0.175101882 | 0.126   |
| E. pallida        | 0.3758625 | -0.475515 | 0.001   | L. virginica      | 0.258664675  | -0.141856715 | 0.153   |
| C. fasciculata    | 0.4120677 | 0.7460587 | 0.001   | T. ohiensis       | -0.158656923 | -0.245984531 | 0.158   |
| S. faberi         | -0.77588  | -0.083553 | 0.001   | D. illinoensis    | 0.133212985  | -0.261548602 | 0.161   |
| E. yuccifolium    | 0.430899  | -0.373672 | 0.002   | E. serpens        | 0.276365312  | -0.153517549 | 0.165   |
| H. helianthoides  | 0.3823069 | -0.329738 | 0.003   | D. candidum       | 0.277384022  | -0.074299782 | 0.179   |
| R. columnifera    | 0.2631774 | -0.388539 | 0.004   | V. virginicum     | -0.244972074 | 0.009170384  | 0.284   |
| M. lupulina       | 0.2941195 | -0.378259 | 0.004   | L. alternifolia   | -0.001820594 | 0.236450071  | 0.298   |
| A. artemisiifolia | 0.2044813 | 0.4260718 | 0.005   | D. carota         | 0.082723255  | -0.19677555  | 0.375   |
| S. scoparium      | 0.4244076 | 0.2123334 | 0.009   | S. heterolepis    | 0.19422846   | 0.013379474  | 0.451   |
| P. aviculare      | 0.0028758 | 0.4169241 | 0.016   | D. tectorum       | 0.023672411  | -0.179563342 | 0.481   |
| V. sororia        | 0.2141607 | -0.380134 | 0.018   | H. grosseserratus | 0.168225303  | -0.05584329  | 0.542   |
| R. hirta          | 0.4068963 | 0.0594642 | 0.024   | G. squarrosa      | 0.044192096  | -0.142147174 | 0.594   |
| UF (Unknown Forb) | 0.1385269 | -0.362878 | 0.03    | D. oligosanthos   | 0.006517825  | -0.15044677  | 0.623   |
| B. alba           | 0.323966  | 0.1972003 | 0.035   | P. virgatum       | -0.103626242 | -0.098590004 | 0.648   |
| S. lanceolata     | 0.0683162 | 0.3843318 | 0.036   | P. capillare      | -0.09356524  | 0.103126322  | 0.661   |
| A. tuberosa       | 0.2083887 | -0.310465 | 0.045   | O. biennis        | 0.044289418  | -0.10595681  | 0.703   |
| P. cuspidatum     | -0.042617 | 0.3576915 | 0.048   | A. canescens      | 0.098636362  | -0.06857567  | 0.748   |
| A. gerardii       | 0.1858767 | 0.4012776 | 0.049   | A. syriaca        | -0.104058351 | 0.0481726    | 0.751   |
| C. lanceolata     | 0.3055674 | 0.1741912 | 0.071   | M. microphylla    | -0.039982544 | 0.107509211  | 0.759   |
| A. retroflexus    | 0.0682149 | 0.3365135 | 0.076   | S. marilandrica   | 0.013223296  | 0.114317863  | 0.768   |
| C. hirsuta        | 0.2094112 | -0.284899 | 0.08    | S. rigida         | 0.004893479  | -0.1147546   | 0.774   |
| C. tinctoria      | 0.1679516 | -0.278248 | 0.09    | M. fistulosa      | 0.095809866  | 0.01902825   | 0.827   |
| M. officinalis    | 0.1491952 | -0.308403 | 0.097   | D. purpureum      | -0.049126286 | 0.046181751  | 0.904   |
| E. purpurea       | 0.2626425 | -0.170812 | 0.11    | O. pedunculatum   | 0.002649747  | 0.007634337  | 0.998   |
| P. albidus        | 0.2947405 | -0.139059 | 0.113   |                   |              |              |         |

Table S3. The main effect of inoculation (bold) and contrasts results from our PROC GLM model in SAS on total abundance and by nativeness and successional stage (A) and for plant community diversity and by functional group (B) for the first harvest.

| Table S3A. Harvest 1                      |    | Total Diversity |         | Total Abundance |         | Native Abundance |         | Non-Native Abundance |         | Relative Invasion |         |
|-------------------------------------------|----|-----------------|---------|-----------------|---------|------------------|---------|----------------------|---------|-------------------|---------|
| Predictors                                | DF | F Value         | P Value | F Value         | P Value | F Value          | P Value | F Value              | P Value | F Value           | P Value |
| <b>Inoculation Treatment</b>              | 3  | 8.62            | 0.0003  | 3.45            | 0.0298  | 7.07             | 0.0011  | 5.25                 | 0.0053  | 7.6               | 0.0007  |
| <b>Block</b>                              | 10 | 1.58            | 0.165   | 6.57            | <0.0001 | 4.06             | 0.0016  | 2.12                 | 0.0569  | 1.61              | 0.1559  |
| <b>Contrasts</b>                          |    |                 |         |                 |         |                  |         |                      |         |                   |         |
| <i>Inoculated vs. Non-Inoculated</i>      | 1  | 15              | 0.0006  | 0.16            | 0.6958  | 12.37            | 0.0015  | 9.53                 | 0.0045  | 15.13             | 0.0006  |
| <i>Having Native AM Fungi vs. Not</i>     | 1  | 15.08           | 0.0006  | 3.89            | 0.0585  | 0.03             | 0.8666  | 1.74                 | 0.1972  | 0.2               | 0.6568  |
| <i>Whole Soil vs. Whole Soil+AM Fungi</i> | 1  | 8.95            | 0.0057  | 10.19           | 0.0035  | 6.09             | 0.0199  | 0.31                 | 0.5849  | 2.3               | 0.1406  |
| <i>Differences Among Living</i>           | 2  | 5.43            | 0.0102  | 5.1             | 0.0129  | 4.41             | 0.0216  | 3.11                 | 0.0605  | 3.83              | 0.0339  |

  

| Table S3B. Harvest 1                      |    | Early Successional |         | Late Successional |         | Native Forbs |         | Native Grasses |         | Native Legumes |         |
|-------------------------------------------|----|--------------------|---------|-------------------|---------|--------------|---------|----------------|---------|----------------|---------|
| Predictors                                | DF | F Value            | P Value | F Value           | P Value | F Value      | P Value | F Value        | P Value | F Value        | P Value |
| <b>Inoculation Treatment</b>              | 3  | 4.65               | 0.0093  | 2.78              | 0.0597  | 7.31         | 0.0009  | 2.89           | 0.0528  | 1.43           | 0.2548  |
| <b>Block</b>                              | 10 | 3.96               | 0.0019  | 1.68              | 0.1342  | 3.61         | 0.0035  | 4.32           | 0.0011  | 2.73           | 0.0175  |
| <b>Contrasts</b>                          |    |                    |         |                   |         |              |         |                |         |                |         |
| <i>Inoculated vs. Non-Inoculated</i>      | 1  | 5.2                | 0.0304  | 8.06              | 0.0083  | 11.26        | 0.0023  | 0.62           | 0.4385  | 1.29           | 0.265   |
| <i>Having Native AM Fungi vs. Not</i>     | 1  | 0.85               | 0.3648  | 2.53              | 0.1227  | 0.25         | 0.6207  | 1.72           | 0.2001  | 3.36           | 0.0777  |
| <i>Whole Soil vs. Whole Soil+AM Fungi</i> | 1  | 7.05               | 0.0129  | 0                 | 0.9445  | 8.69         | 0.0064  | 4.98           | 0.0339  | 2.98           | 0.0951  |
| <i>Differences Among Living</i>           | 2  | 4.38               | 0.0222  | 0.14              | 0.8725  | 5.34         | 0.0109  | 4.03           | 0.0289  | 1.5            | 0.2408  |

Table S4. The main effect of inoculation (bold) and contrasts results from our PROC GLM model in SAS on total abundance and by nativeness and successional stage (A) and for plant community diversity and by functional group (B) for the second harvest.

| Table S4A. Harvest 2                      |    | Total Diversity |         | Total Abundance |         | Native Abundance |         | Non-Native Abundance |         | Relative Invasion |         |
|-------------------------------------------|----|-----------------|---------|-----------------|---------|------------------|---------|----------------------|---------|-------------------|---------|
| Predictors                                | DF | F Value         | P Value | F Value         | P Value | F Value          | P Value | F Value              | P Value | F Value           | P Value |
| <b>Inoculation Treatment</b>              | 3  | 17.86           | <0.0001 | 2.01            | 0.134   | 15.04            | <0.0001 | 18.28                | <0.0001 | 18.8              | <0.0001 |
| <b>Block</b>                              | 10 | 2.03            | 0.0662  | 2.06            | 0.0613  | 0.99             | 0.4725  | 1.86                 | 0.0923  | 0.75              | 0.6713  |
| <b>Contrasts</b>                          |    |                 |         |                 |         |                  |         |                      |         |                   |         |
| <i>Inoculated vs. Non-Inoculated</i>      | 1  | 44.59           | <0.0001 | 0.41            | 0.5261  | 36.99            | <0.0001 | 39.49                | <0.0001 | 43.41             | <0.0001 |
| <i>Having Native AM Fungi vs. Not</i>     | 1  | 39.02           | <0.0001 | 1.59            | 0.2176  | 32.99            | <0.0001 | 17.98                | 0.0002  | 36.38             | <0.0001 |
| <i>Whole Soil vs. Whole Soil+AM Fungi</i> | 1  | 8.2             | 0.0076  | 1.19            | 0.2843  | 7.66             | 0.0096  | 6.62                 | 0.0153  | 12.53             | 0.0013  |
| <i>Differences Among Living</i>           | 2  | 4.5             | 0.0195  | 2.81            | 0.0763  | 4.06             | 0.0276  | 7.68                 | 0.002   | 6.49              | 0.0045  |

  

| Table S4B. Harvest 2                      |    | Early Successional |         | Late Successional |         | Native Forbs |         | Native Grasses |         | Native Legumes |         |
|-------------------------------------------|----|--------------------|---------|-------------------|---------|--------------|---------|----------------|---------|----------------|---------|
| Predictors                                | DF | F Value            | P Value | F Value           | P Value | F Value      | P Value | F Value        | P Value | F Value        | P Value |
| <b>Inoculation Treatment</b>              | 3  | 8.04               | 0.0004  | 1.59              | 0.2128  | 5.15         | 0.0054  | 5.57           | 0.0037  | 14.43          | <0.0001 |
| <b>Block</b>                              | 10 | 0.89               | 0.5512  | 0.86              | 0.5769  | 1.65         | 0.1407  | 1.88           | 0.0886  | 0.69           | 0.7239  |
| <b>Contrasts</b>                          |    |                    |         |                   |         |              |         |                |         |                |         |
| <i>Inoculated vs. Non-Inoculated</i>      | 1  | 21.31              | <0.0001 | 1.66              | 0.2068  | 2.85         | 0.1017  | 14.7           | 0.0006  | 26.29          | <0.0001 |
| <i>Having Native AM Fungi vs. Not</i>     | 1  | 15.65              | 0.0004  | 3.63              | 0.0665  | 3.34         | 0.0776  | 2.57           | 0.1194  | 39.91          | <0.0001 |
| <i>Whole Soil vs. Whole Soil+AM Fungi</i> | 1  | 2.74               | 0.1085  | 0.5               | 0.4836  | 6.34         | 0.0174  | 0              | 0.963   | 13.71          | 0.0009  |
| <i>Differences Among Living</i>           | 2  | 1.41               | 0.2594  | 1.55              | 0.2287  | 6.3          | 0.0052  | 1              | 0.379   | 8.49           | 0.0012  |

Figure S1. Pots shown at harvest in July of 2017.

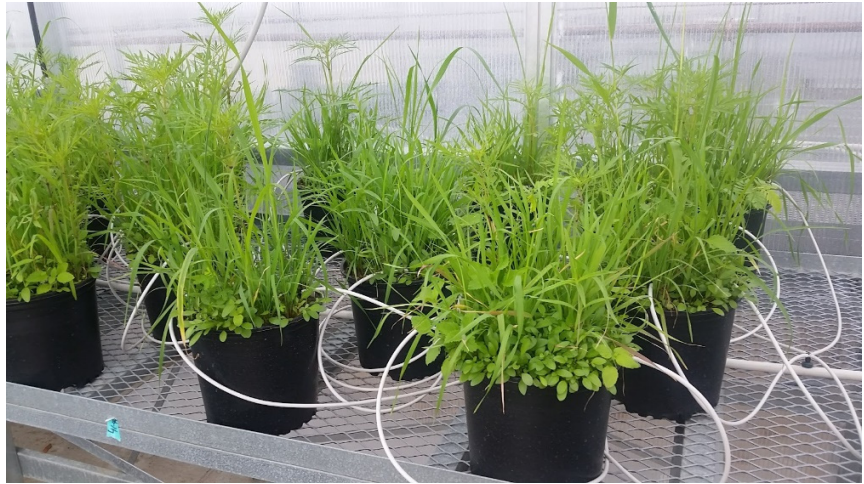

Figure S2. The effect of fungal composition native abundance (A), non-native abundance (B), early successional abundance (C), native forb abundance (D), native grass abundance (E), and total diversity (F) across harvests. Lines connect data from the first (black) or second (gray, double lined) harvest. Points represent the LS means of plant growth and error bars are standard error from the Proc GLM models. These panels include all metrics in which the main effect of inocula was consistent between harvests.

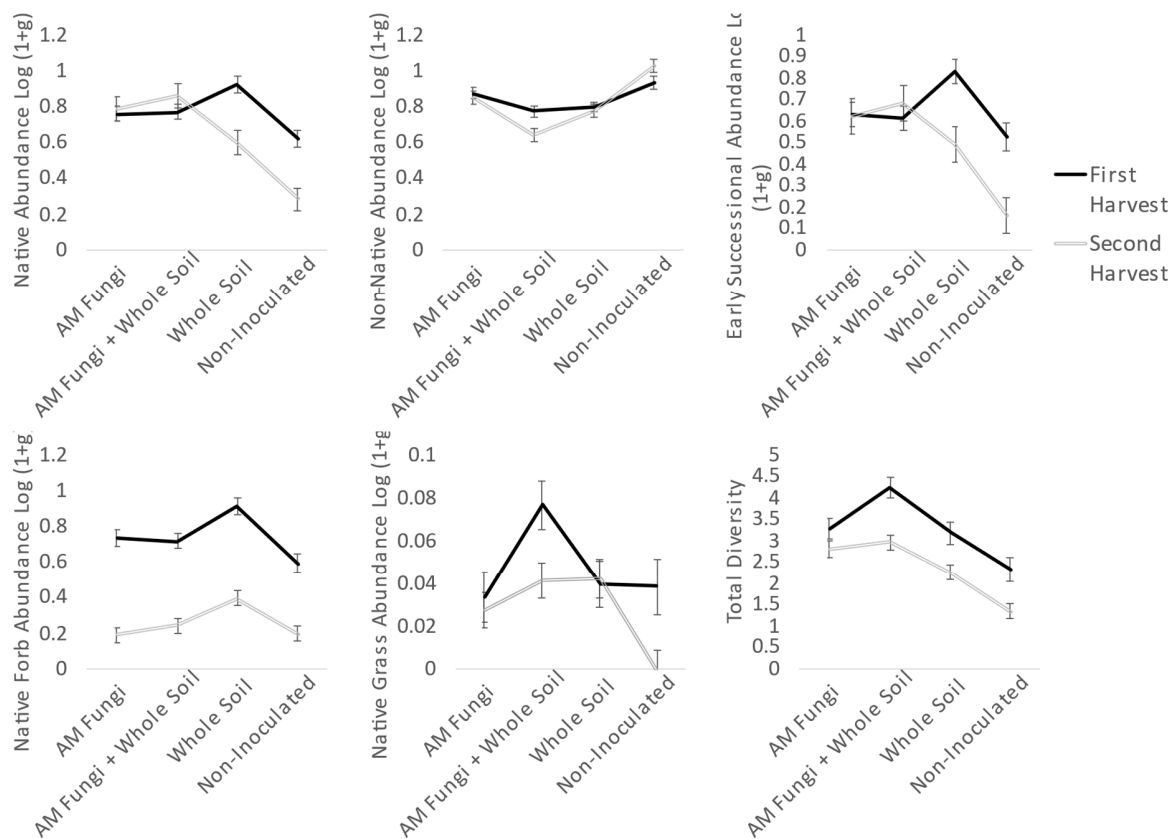

Figure S3. The effect of fungal composition on total mass (A), native legume abundance (B), the proportion of native plants (C), and late successional biomass (D). Lines connect data from the first (black) or second (gray, double lined) harvest. Points represent the LS means of plant growth and error bars are standard error. These panels include all metrics in which the main effect of inocula increased or decreased between harvests.

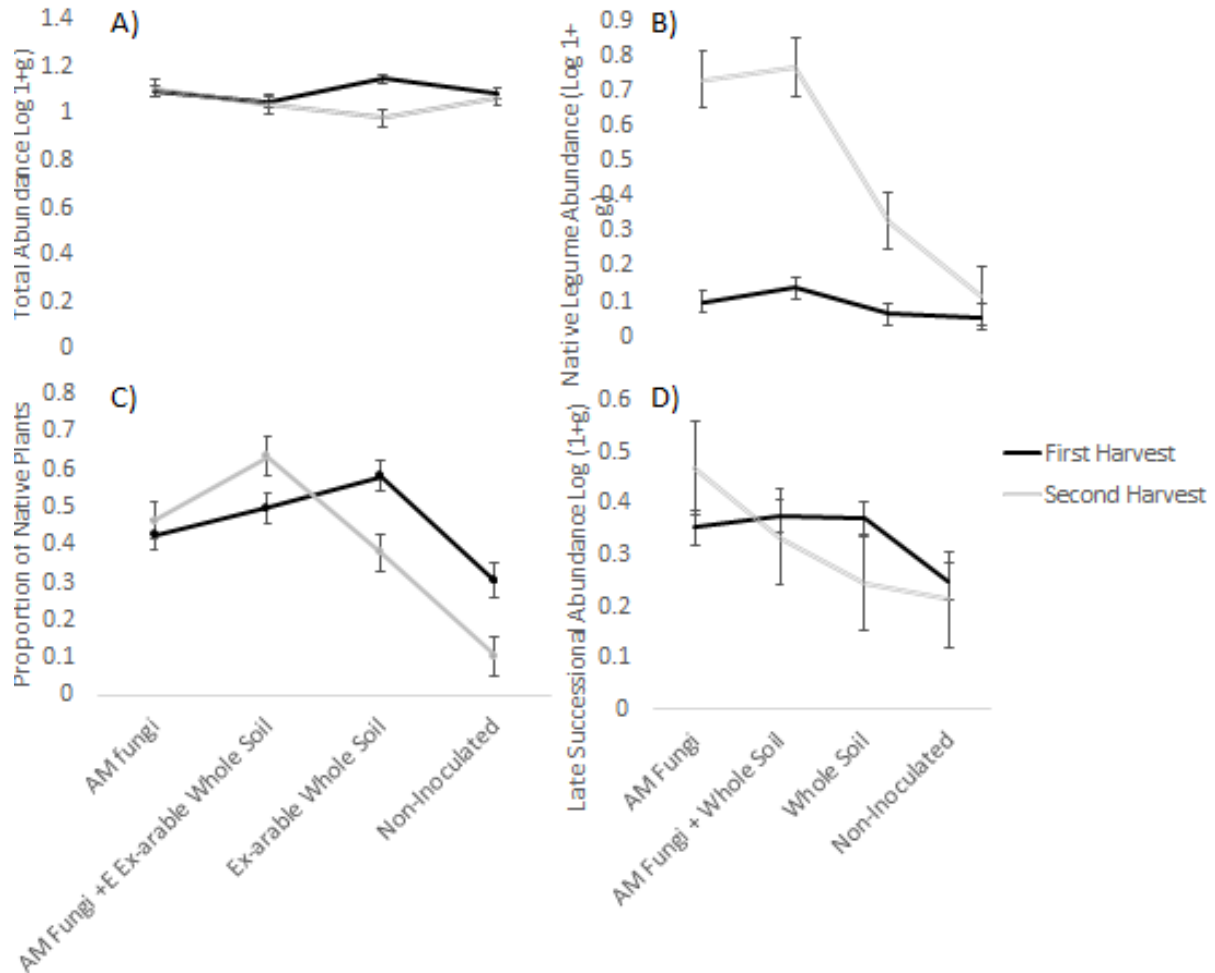

Supplement: s1 [file s1]
